# Supplementary material for: Colorimetric and ratiometric fluorescent chemodosimeter for selective sensing of fluoride and cyanide ions: tuning selectivity in proton transfer and C–Si bond cleavage
Source: Royal Society of Chemistry journal article supplement (doi:10.1039/c4ra12910e), 2015-01-01
Supplement: c4ra12910e1.pdf [file c4ra12910e1.pdf]

## **Supporting Information**

### **Colorimetric and Ratiometric Fluorescent Chemodosimeter for Selective Sensing of Fluoride and Cyanide Ion: Tuning Selectivity in Proton Transfer and C-Si Bond Cleavage**

**Ajit Kumar Mahapatra<sup>\*</sup>,<sup>a</sup> Saikat Kumar Manna,<sup>a</sup> Bhaskar Pramanik,<sup>b</sup> Kalipada Maiti,<sup>a</sup> Sanchita Mondal,<sup>a</sup> Syed Samim Ali<sup>a</sup> and Debasish Mandal<sup>c</sup>**

<sup>a</sup> Department of Chemistry, Indian Institute of Engineering Science and Technology, Shibpur, Howrah-711103, West Bengal, India,

Email: [akmahapatra@rediffmail.com](mailto:akmahapatra@rediffmail.com), Fax: +913326684564

<sup>b</sup> Indian Institute of Science Education and Research, Kolkata, India.

<sup>c</sup> Institute of Chemistry, The Hebrew University of Jerusalem, 91904 Jerusalem, Israel.

1.  $^1\text{H}$  NMR spectrum of LHSi (400 MHz,  $\text{CDCl}_3$ ):

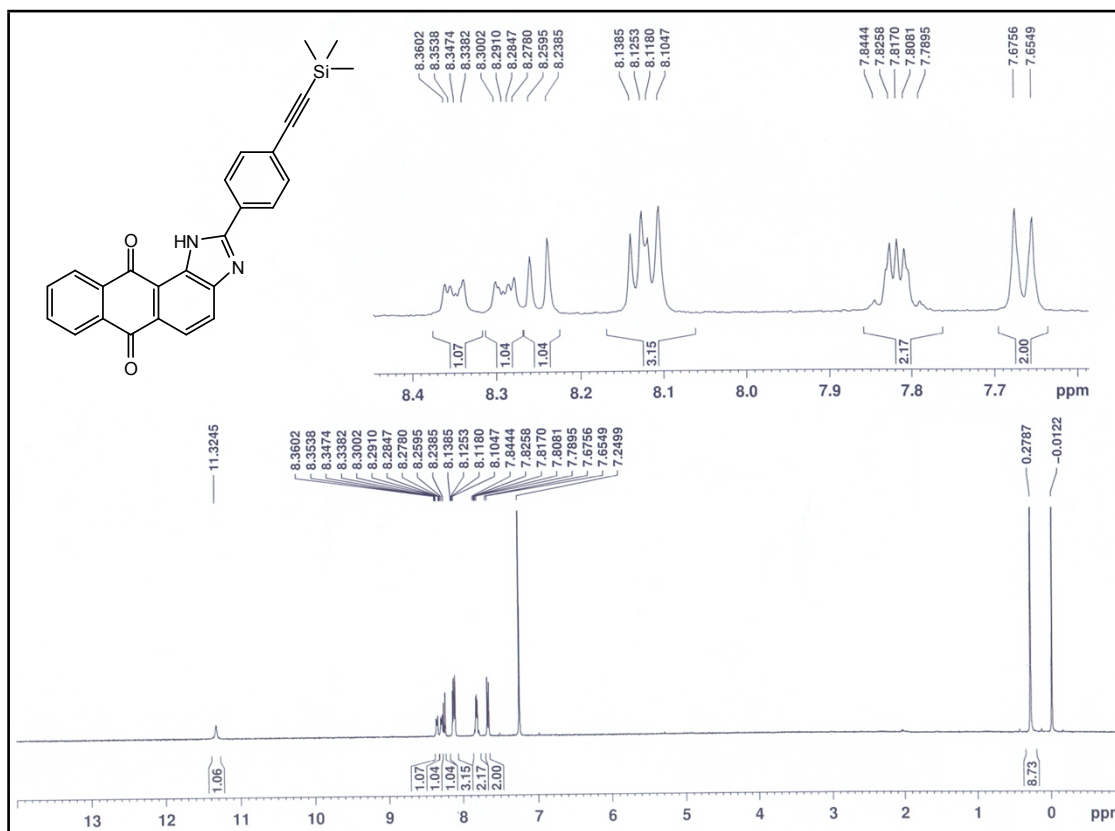

**Figure S1:**  $^1\text{H}$  NMR spectrum of LHSi in  $\text{CDCl}_3$  solution.

2.  $^{13}\text{C}$  NMR spectrum of LHSi (400 MHz,  $\text{CDCl}_3$ ):

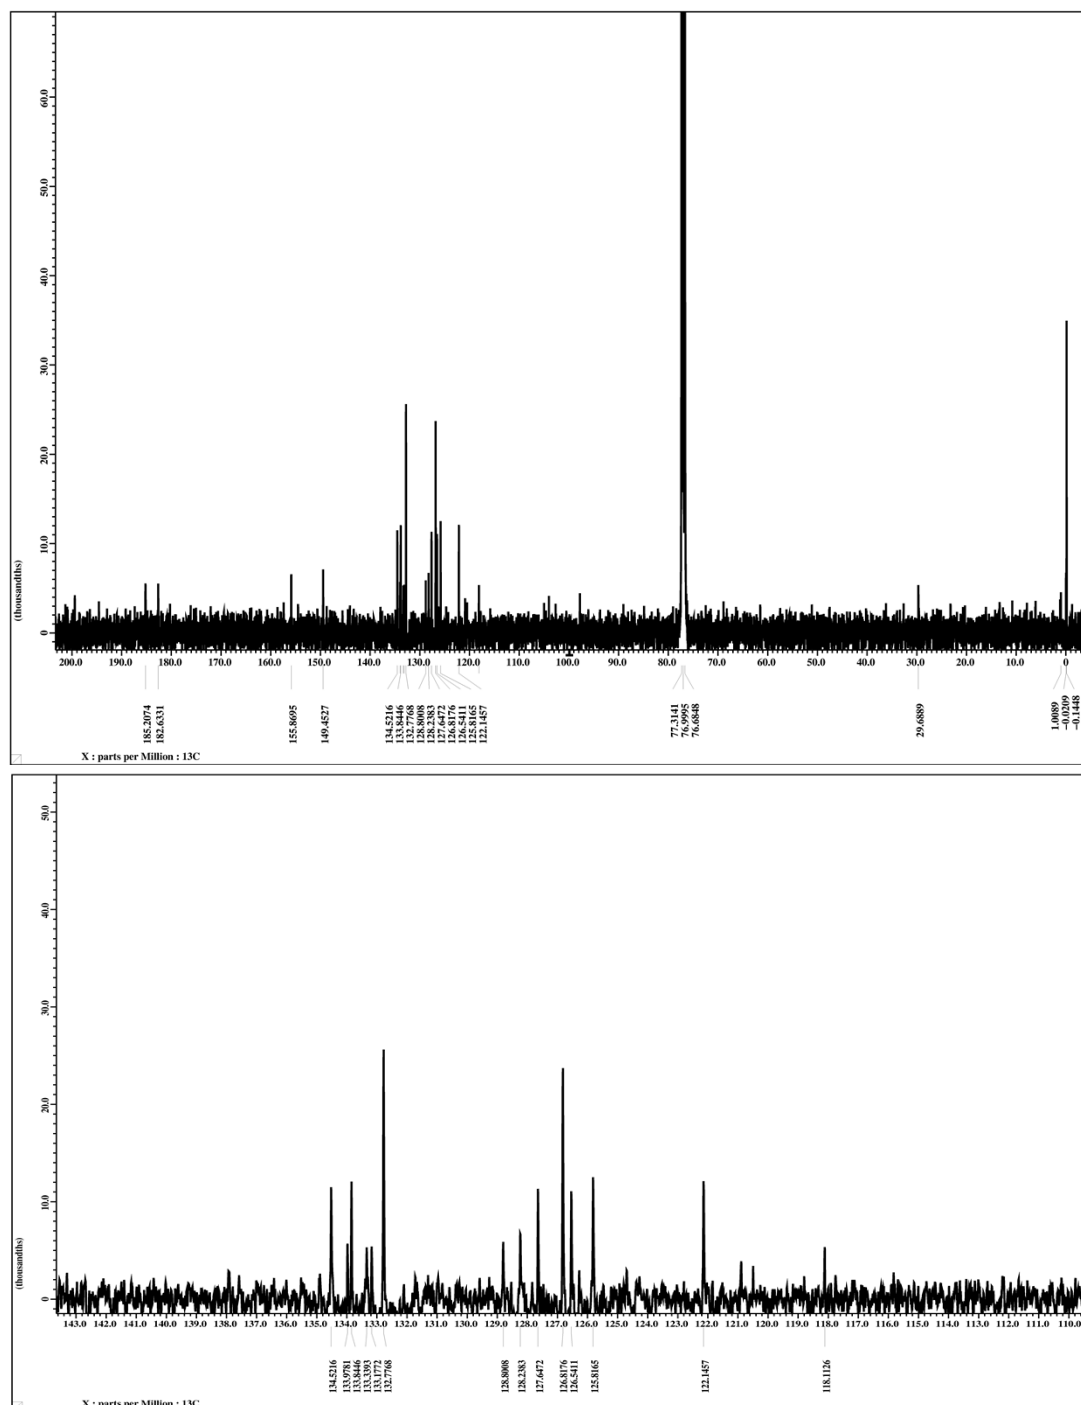

Figure S2:  $^{13}\text{C}$  NMR spectrum of LHSi in  $\text{CDCl}_3$  solution.

### 3. Mass spectrum of LHSi:

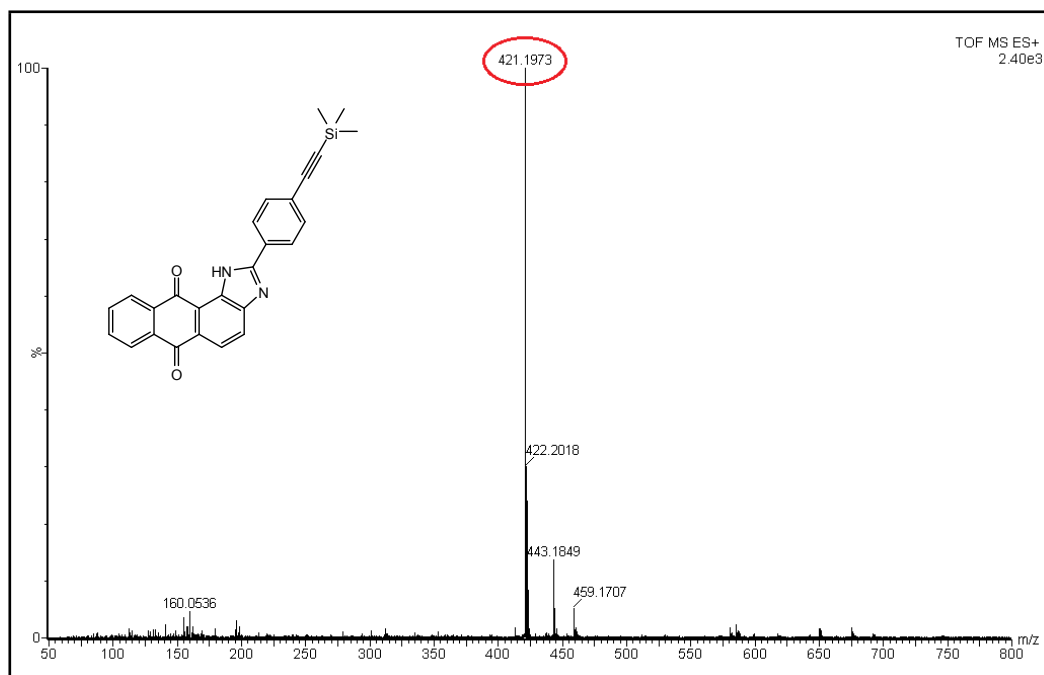

Figure S3: ESI-MS of LHSi .

### 4. UV-Vis and fluorescence spectra of LHSi in presence of TBAOH:

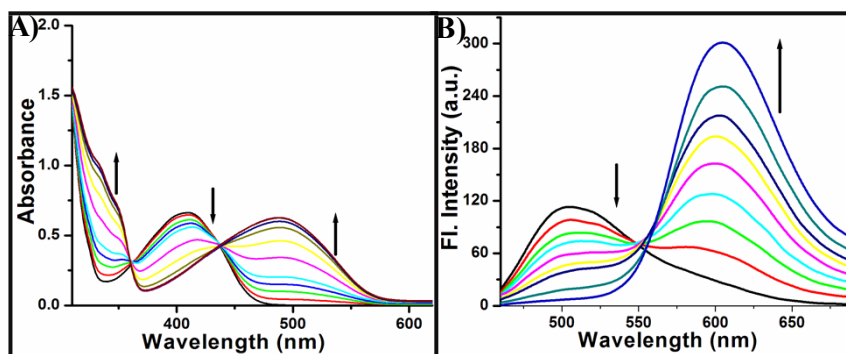

Figure S4: (A) Absorption and (B) fluorescence spectral changes of LHSi ( $c = 4 \times 10^{-5}$  M) upon addition of TBAOH in THF solution.

5.  $^1\text{H}$  NMR titration of LHSi in presence of TBAF:

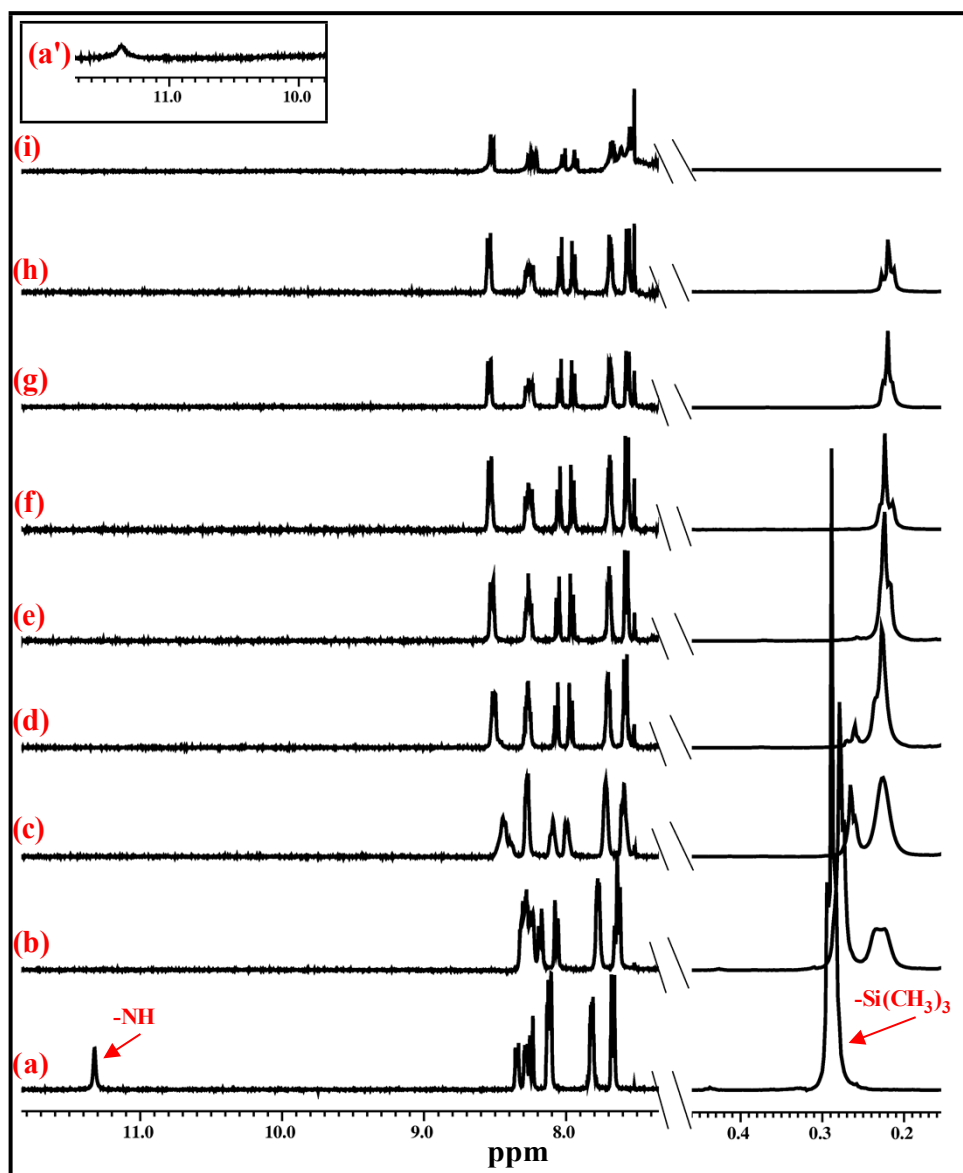

**Figure S5:** Partial  $^1\text{H}$  NMR (400 MHz) spectra of **LHSi** in  $\text{CDCl}_3$  in (a) the absence and the presence of (a') 0.5 (inset) , (b) 1.0, (c) 1.5, (d) 2.0, (e) 2.5, (f) 3.0, (g) 4.0, (h) 5.0, (i) 10.0 equiv of TBAF.

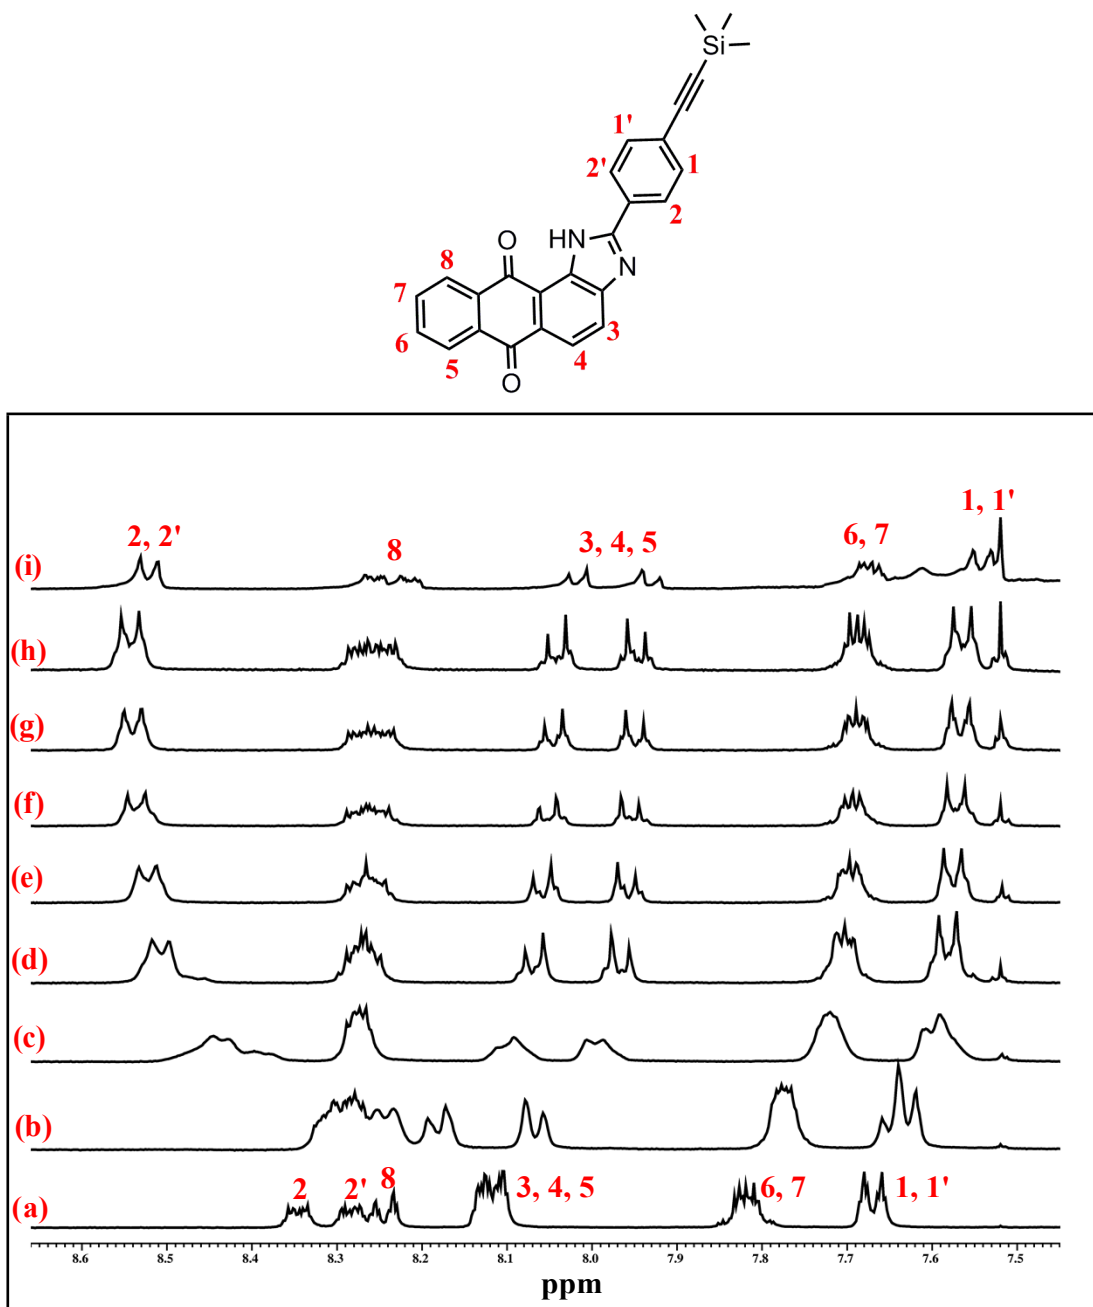

**Figure S6:** Partial expanded <sup>1</sup>H NMR (400 MHz) spectra of aromatic region of **LHSi** in CDCl<sub>3</sub> in (a) the absence and the presence of (b) 1.0, (c) 1.5, (d) 2.0, (e) 2.5, (f) 3.0, (g) 4.0, (h) 5.0, (i) 10.0 equiv of TBAF.

6.  $^1\text{H}$  NMR titration of LHSi in presence of TBACN:

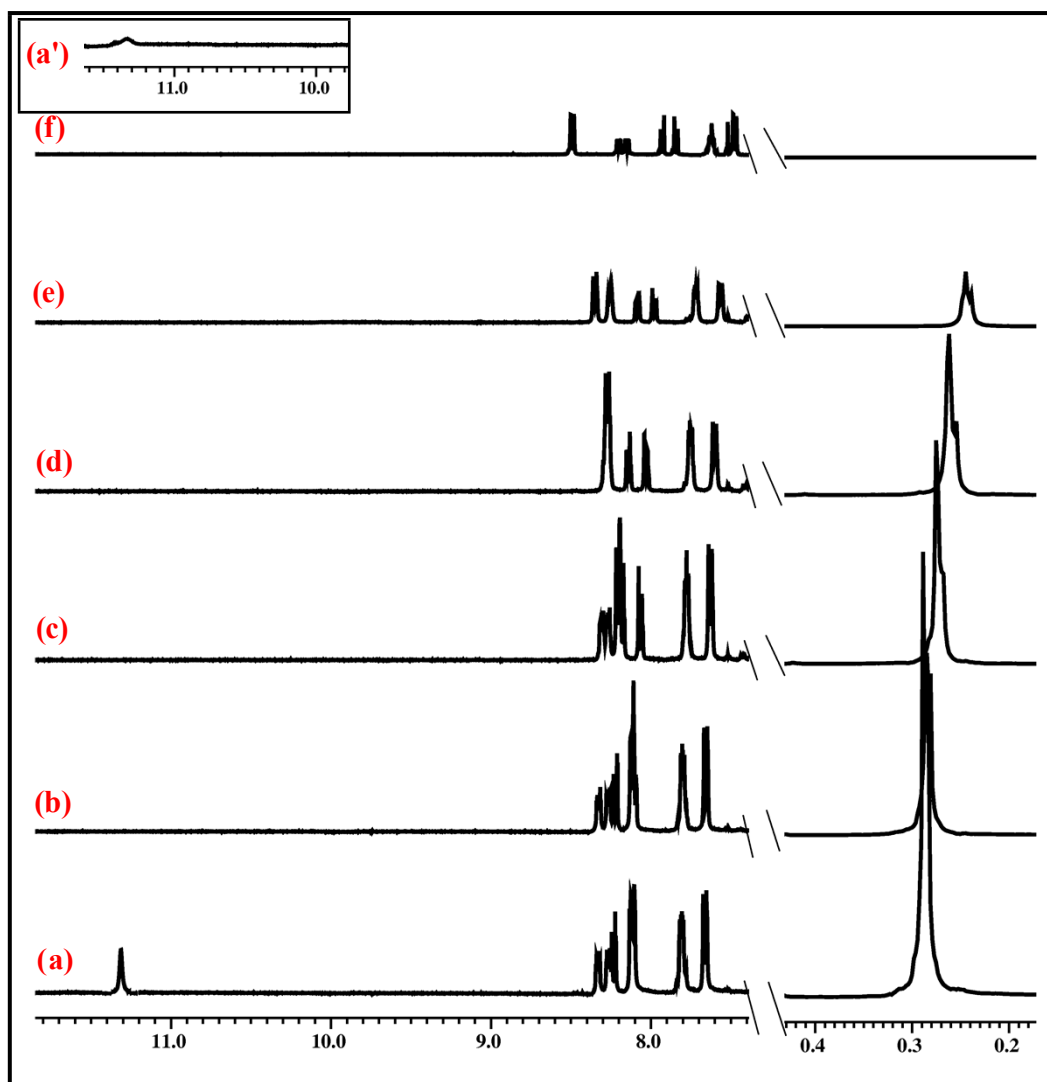

**Figure S7:** Partial  $^1\text{H}$  NMR (400 MHz) spectra of **LHSi** in  $\text{CDCl}_3$  in (a) the absence and the presence of (a') 0.5 (inset), (b) 1.0, (c) 1.5, (d) 2.0, (e) 4.0, (f) 10.0 equiv of TBACN.

### 7. Mass spectrum of LHSi + TBAF:

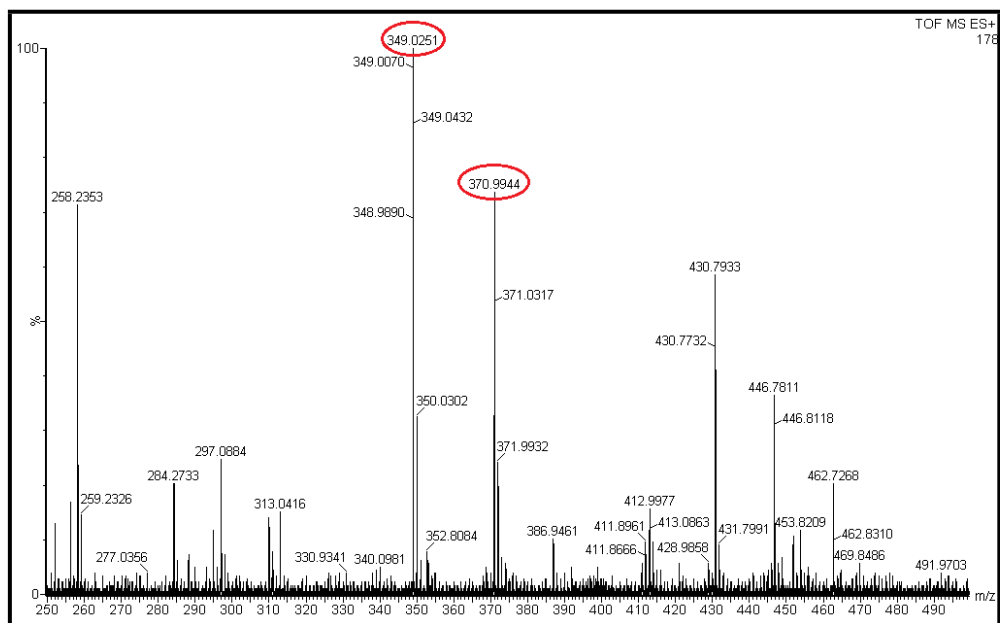

Figure S8: ESI-MS spectral evidence for desilylation of LHSi on treatment with TBAF.

### 8. Mass spectrum of LHSi + TBACN:

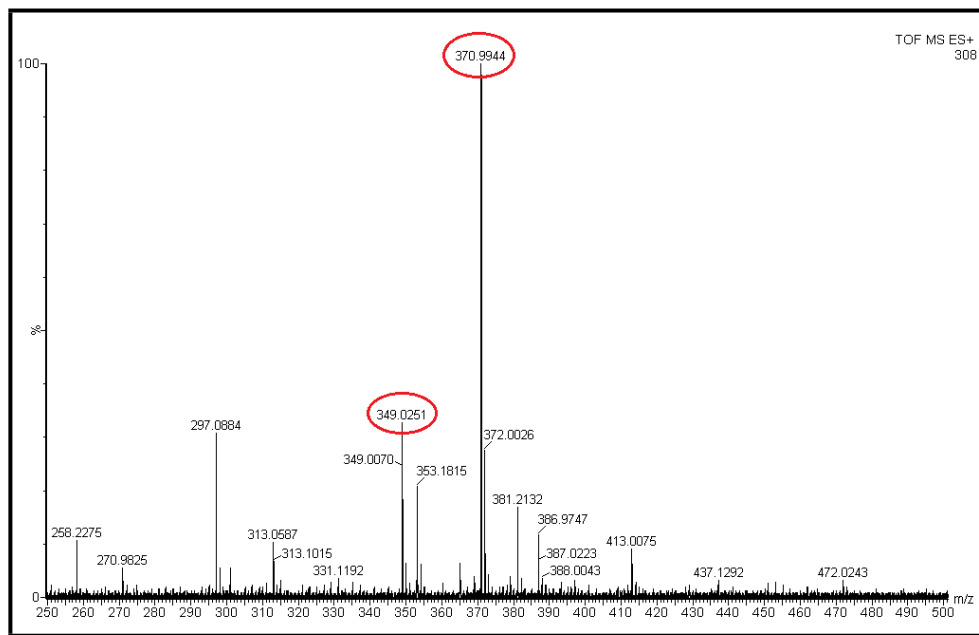

Figure S9: ESI-MS spectral evidence for desilylation of LHSi on treatment with TBACN.

9. Mass spectrum of LHSi on treatment with  $\text{Hg}^{2+}$  as a counteraction with fluoride:

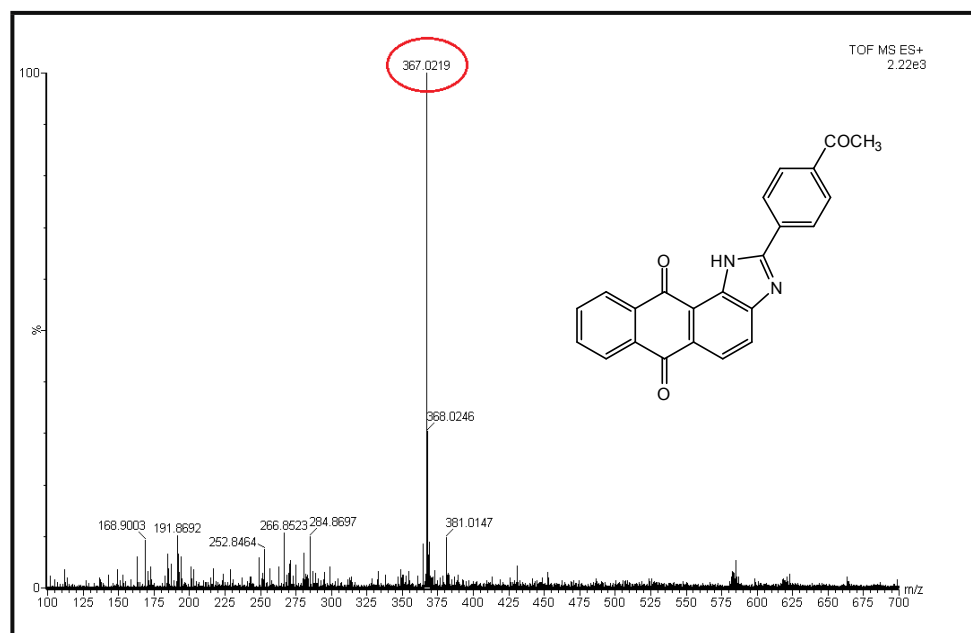

**Figure S10:** ESI-MS of LHSi on treatment with  $\text{Hg}^{2+}$  as a counteraction with fluoride.

## 10. Computational Study:

|                      | Molecular orbital                                                                                  | Electronic contribution of transition |
|----------------------|----------------------------------------------------------------------------------------------------|---------------------------------------|
| <b>LHSi</b>          | 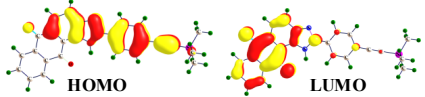<br>HOMO LUMO     | HOMO → LUMO (97.3%)                   |
|                      | 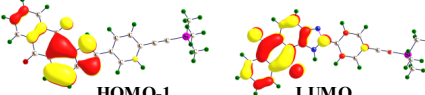<br>HOMO-1 LUMO   | HOMO-1 → LUMO (98.0%)                 |
|                      | 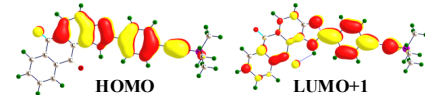<br>HOMO LUMO+1   | HOMO → LUMO+1<br>(90.2%)              |
|                      | 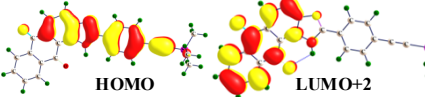<br>HOMO LUMO+2   | HOMO → LUMO+2                         |
| <b>L<sup>-</sup></b> | 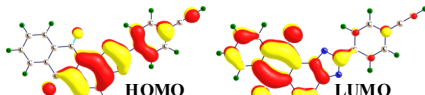<br>HOMO LUMO    | HOMO → LUMO (83.5%)                   |
|                      | 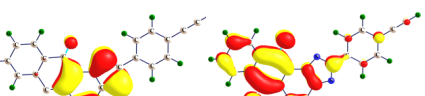<br>HOMO-1 LUMO | HOMO-1 → LUMO (13.8%)                 |
|                      | 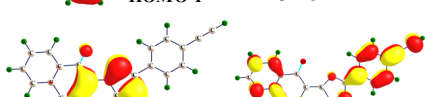<br>HOMO LUMO+1 | HOMO → LUMO+1<br>(93.5%)              |
|                      | 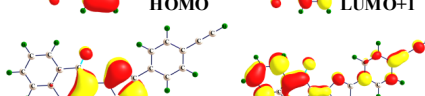<br>HOMO LUMO+2 | HOMO → LUMO+2                         |

**Figure S11.** Molecular orbitals and electronic contribution of the relevant excitations of **LHSi** and **L<sup>-</sup>**.

**Table S1.** Selected electronic excitation energies (eV), oscillator strengths (f), main configurations, and CI Coefficients of the low-lying excited states of **LHSi** and **L<sup>-</sup>**. The data were calculated by TDDFT//B3LYP/6-31+G(*d*) based on the optimized ground state geometries.

| Molecules            | Electronic Transition            | Excitation Energy <sup>a</sup> | f <sup>b</sup> | Composition <sup>c</sup> | (composition) % |
|----------------------|----------------------------------|--------------------------------|----------------|--------------------------|-----------------|
| <b>LHSi</b>          | S <sub>0</sub> → S <sub>1</sub>  | 2.6362 eV 470 nm               | 0.3664         | H → L                    | 97.3            |
|                      | S <sub>0</sub> → S <sub>3</sub>  | 3.1090 eV 398.79 nm            | 0.9420         | H-1 → L                  | 98.0            |
|                      | S <sub>0</sub> → S <sub>8</sub>  | 3.8881 eV 318.88 nm            | 1.0016         | H → L + 1<br>H → L + 2   | 90.2            |
|                      | S <sub>0</sub> → S <sub>16</sub> | 4.6356 eV 267.46 nm            | 0.2809         | H-1 → L + 2<br>H → L + 3 | 85.1            |
| <b>L<sup>-</sup></b> | S <sub>0</sub> → S <sub>2</sub>  | 2.3657 eV 524.09 nm            | 0.3417         | H-1 → L<br>H → L         | 13.8<br>83.5    |
|                      | S <sub>0</sub> → S <sub>6</sub>  | 3.4742 eV 356.87 nm            | 0.5410         | H → L+1<br>H → L+2       | 93.5            |
|                      | S <sub>0</sub> → S <sub>8</sub>  | 3.6764 eV 337.24 nm            | 0.2539         | H-1 → L+3                | 87.3            |
|                      |                                  |                                |                |                          |                 |

[a] Only selected excited states were considered. The numbers in parentheses are the excitation energy in wavelength. [b] Oscillator strength. [c] H stands for HOMO and L stands for LUMO.
